# Supplementary material for: Inhibitors of the Cdc34 acidic loop: A computational investigation integrating molecular dynamics, virtual screening and docking approaches
Source: PubMed Central journal article supplement — FEBS Open Bio. 2014 May 9;4:473–84. doi: 10.1016/j.fob.2014.04.011 (PMC4050183; doi:10.1016/j.fob.2014.04.011), 2014-05-09
Supplement: mmc1.pdf [file mmc1.pdf]

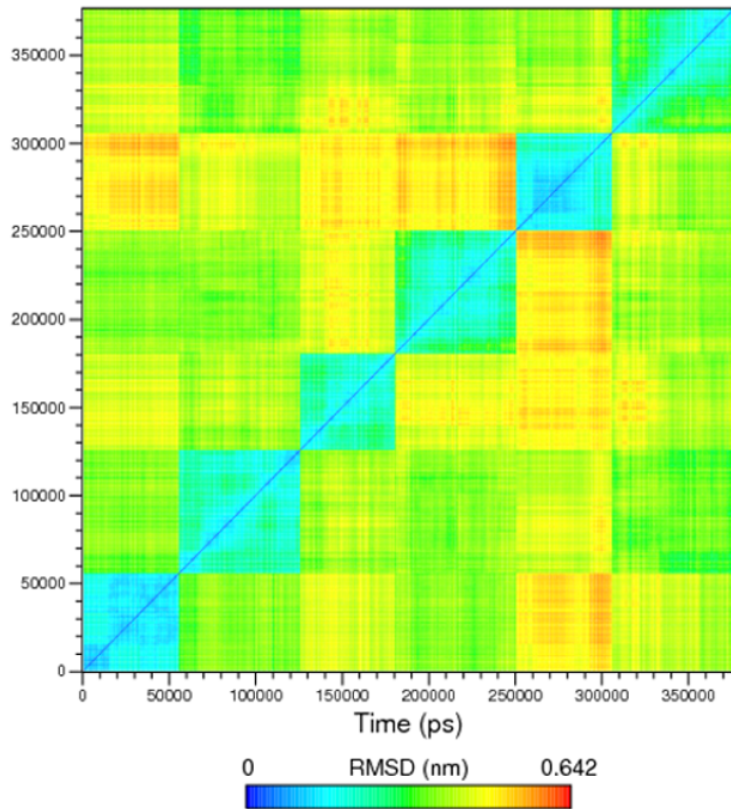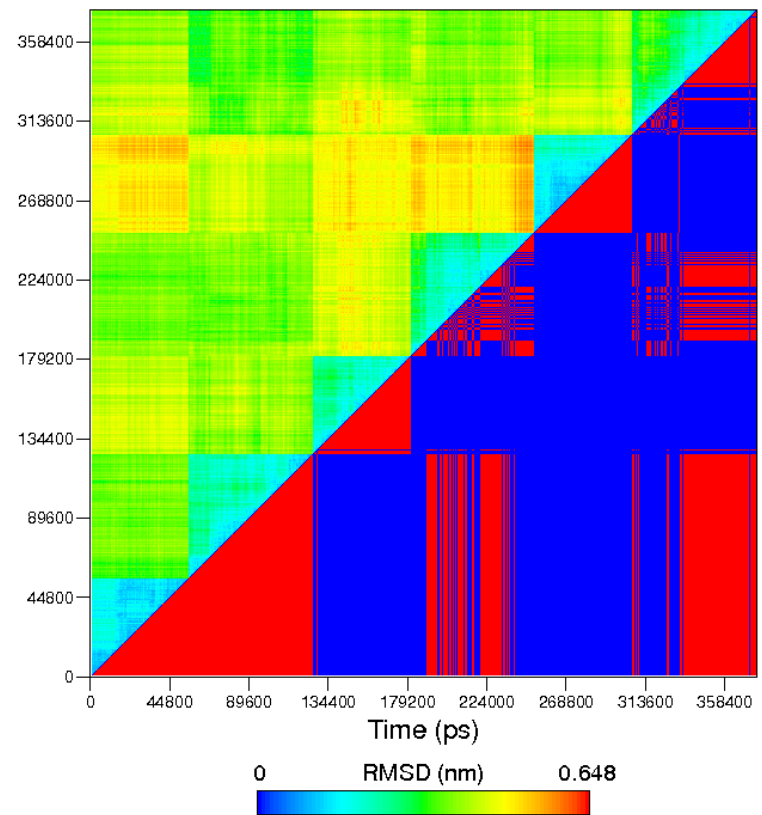

**Figure 1S.** C-alpha rmsd matrix (right panel) and structural cluster analysis (left panel) from Cdc34 MD ensemble. The RMSD values are ordered on a color scale which ranges from blue (values close to 0) to red (high values). In the right panel the red boxes indicates structures belonging to different clusters or that revisited the same cluster in the ensemble.

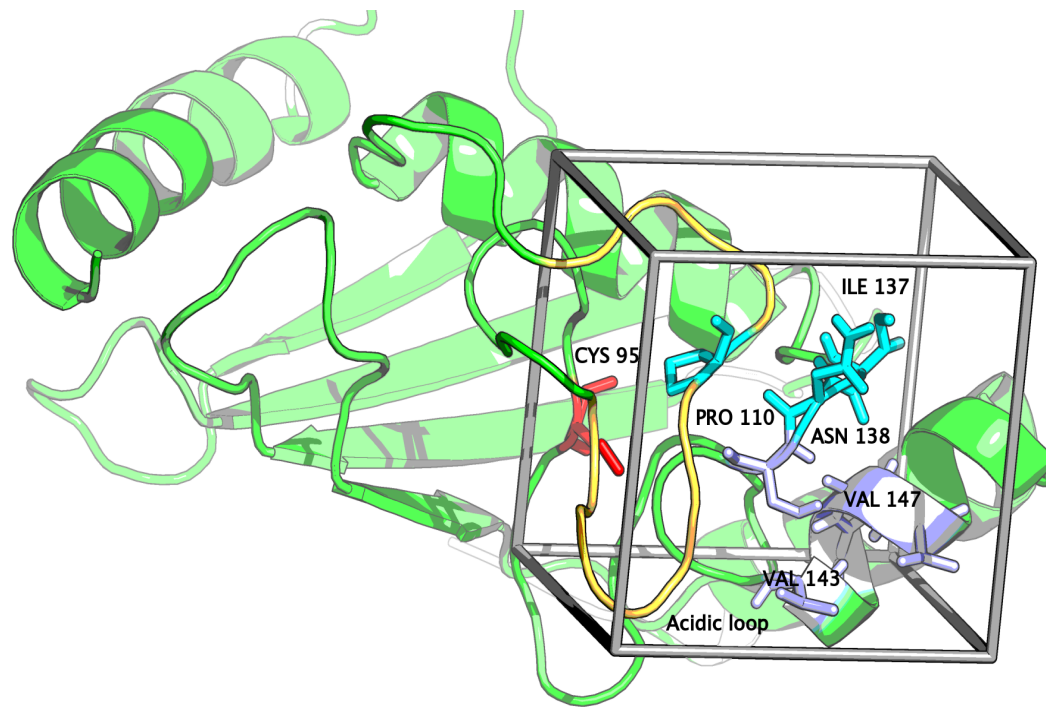

**Figure 2S.** The grid describing the Autodock search space was drawn using the Autodock tools (MGL-tools).

|          |                                                                  |     |
|----------|------------------------------------------------------------------|-----|
| Sc_Cdc34 | . . . .MSSRKSTASSLLLRQYRELTPDKKAIPSFHIELEDDSNIFTWNIGVMVLNEDSIYH  | 60  |
| Hs_Cdc34 | . . .MARPLVPSSQKALLLELKLQEE.PVEG.FRVTLVDEGDLYNWEVAIFGP.PNTYYE    |     |
| Sc_Cdc34 | GG.FFKAQMRFPEDFPFSPQFRFTPAIYHPNVYRDGRLCISILHQSG.DPMTDEPDAET      | 120 |
| Hs_Cdc34 | GG.YFKARLKFPIDYPYSPPAFRFLTKMWHPNYETGDVCISILHPPVDDPQSGELPSER      |     |
| Sc_Cdc34 | WSPVQTVESVLISIVSLLLEDPNINSPANVDAADVDRK. . . . .NPEQYKQRVKMEEVERS | 180 |
| Hs_Cdc34 | WNPTQNVRTILLSVISLLNEPNTFSPANVDASVMYRKWKESKGGKDR.EYTDIIRKQVLGT    |     |
| Sc_Cdc34 | KQD                                                              | 183 |
| Hs_Cdc34 | KVD                                                              |     |

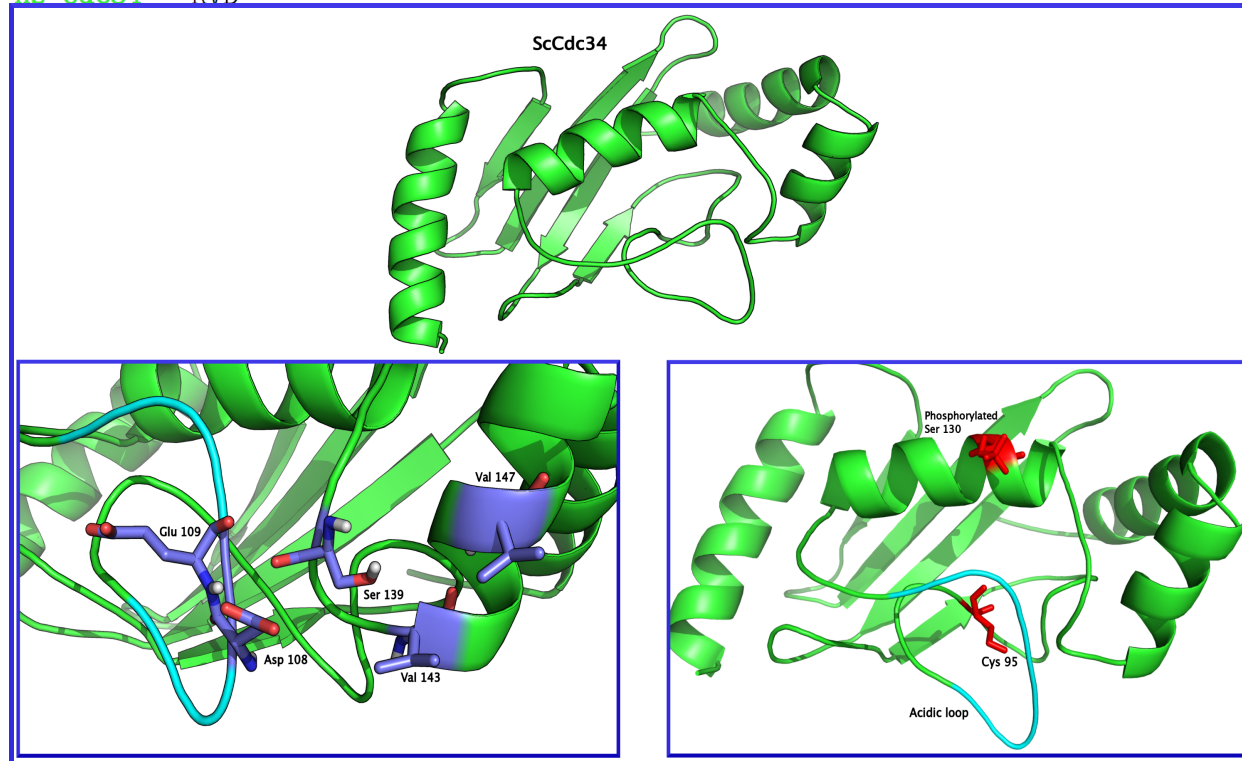

**Figure 3S.** Sequence conservation between ScCdc34 and HsCdc34: conserved residues implicated in inhibitors binding are coloured in violet, the catalytic cysteine and serine 139 are reported in red.
